# Supplementary material for: Core–shell structured poly(vinylidene fluoride)-grafted-BaTiO3 nanocomposites prepared via reversible addition–fragmentation chain transfer (RAFT) polymerization of VDF for high energy storage capacitors
Source: Royal Society of Chemistry journal article supplement (doi:10.1039/c8py01706a), 2019-01-01
Supplement: c8py01706a1.pdf [file c8py01706a1.pdf]

## Supporting information

### **Core shell structured Poly(Vinylidene Fluoride) *-grafted-* BaTiO<sub>3</sub> nanocomposites prepared via Reversible Addition-fragmentation chain transfer (RAFT) polymerization of VDF for high energy storage capacitors**

**Fatima Ezzahra BOUHARRAS, <sup>a,b</sup> Mustapha RAIHANE, <sup>a\*</sup> Gilles SILLY,<sup>b</sup> Cedric TOTEE,<sup>b</sup> Bruno AMEDURI <sup>b\*</sup>**

<sup>a</sup> Laboratory of Organometallic and Macromolecular Chemistry-Composite Materials (LCO2MC). Faculty of Sciences and Techniques, Cadi-Ayyad University, Av. Abdelkrim Khattabi, BP 549, 40000 Marrakesh, Morocco

<sup>b</sup> Ingénierie et Architectures Macromoléculaires Team, Institut Charles Gerhardt, UMR 5253 CNRS, UM, ENSCM, Place Eugène Bataillon, 34095 Cedex 5 Montpellier, France

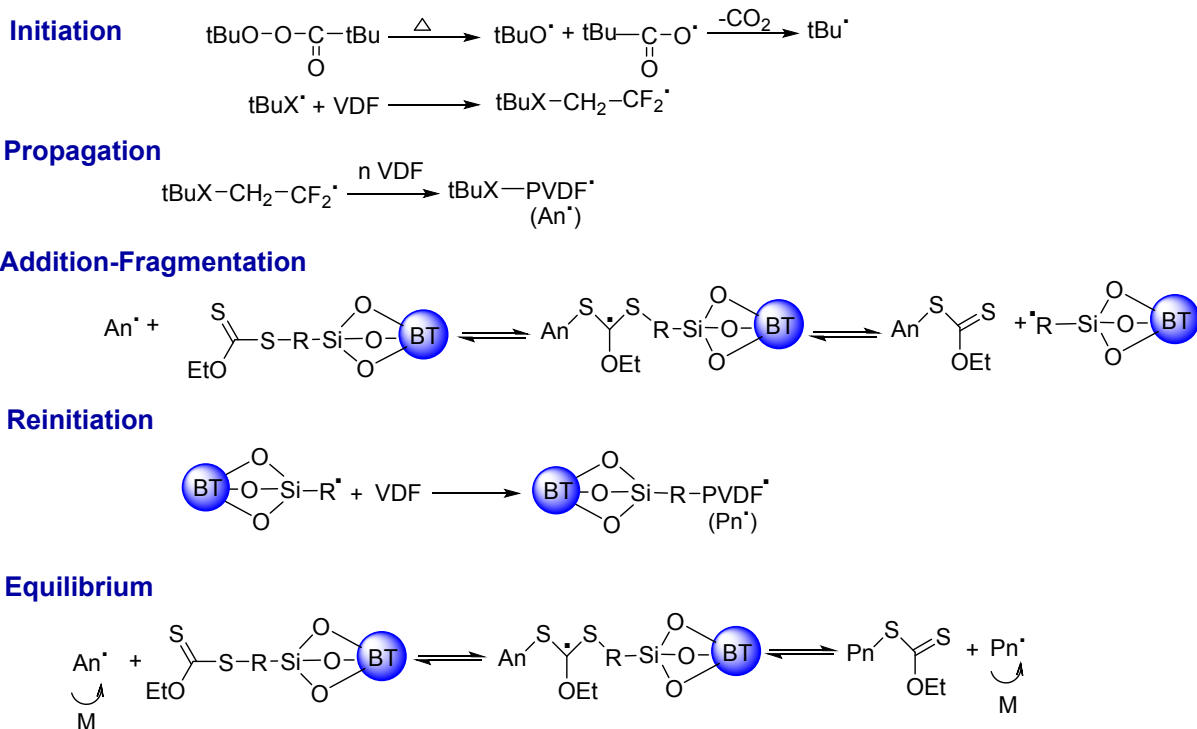

**Scheme S1.** Mechanism of Reversible Addition-Fragmentation Chain-Transfer Polymerization (RAFT) of VDF.

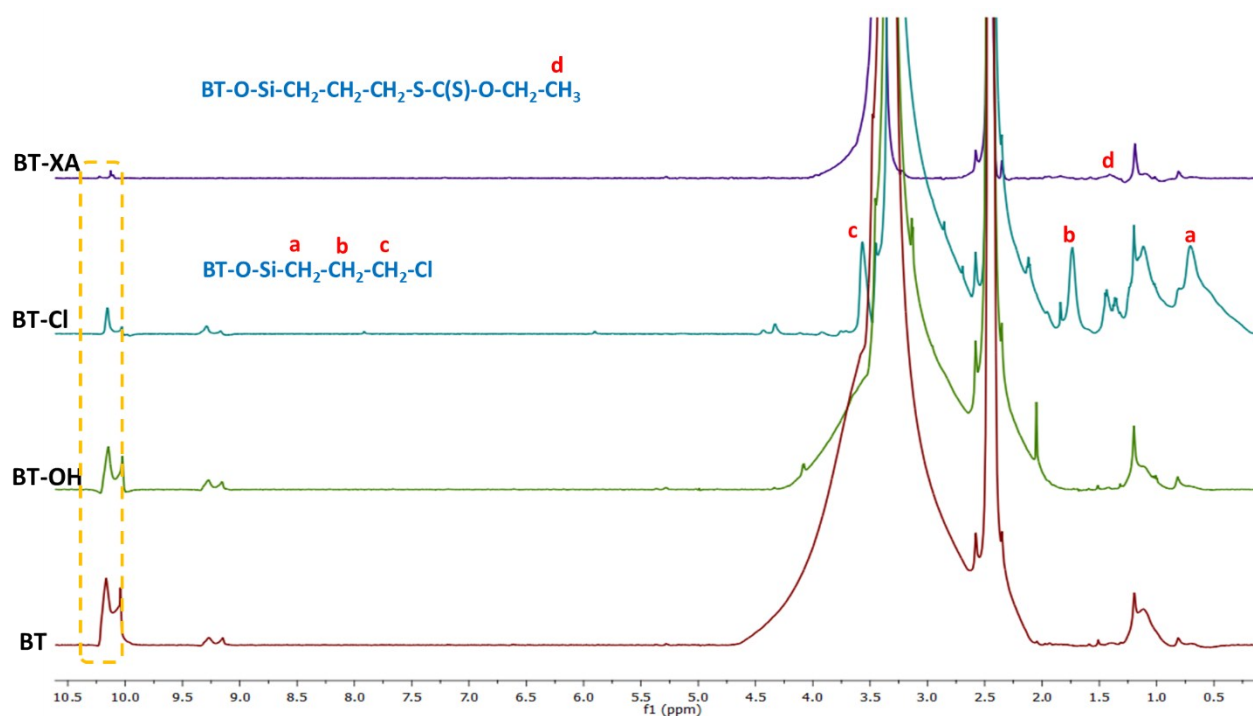

**Figure S1.** Expansion of the 0.5 to 10.5 ppm region of the <sup>1</sup>H HRMAS spectrum in DMSO of pristine BaTiO<sub>3</sub> (BT), modified with hydrogen peroxide (BT-OH), with silane agent (BT-Cl) and with chain transfer agent (BT-XA).

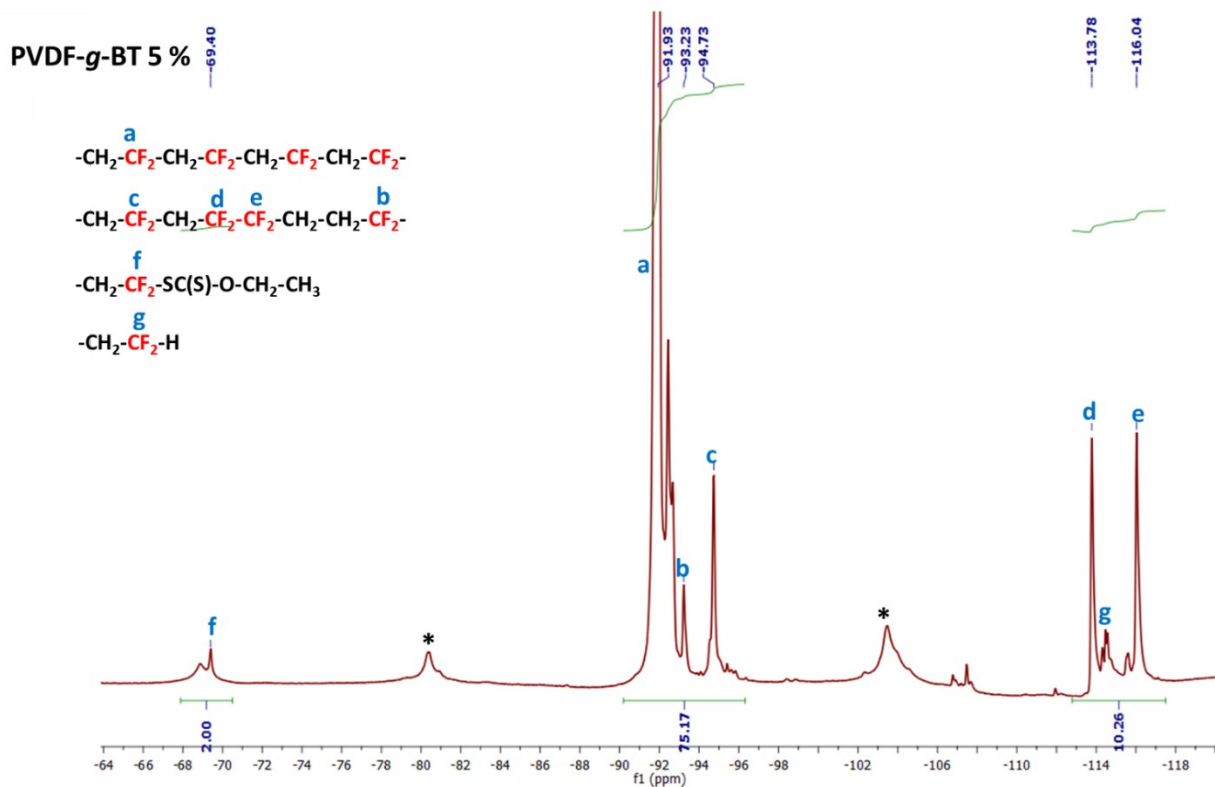

**Figure S2.** Expansion of the  $-64$  to  $-120$  ppm region of the  $^{19}\text{F}$  HRMAS spectrum recorded in  $\text{d}_6\text{-DMSO}$  of PVDF-*g*-BaTiO<sub>3</sub> nanocomposite filled with 5 wt % of BaTiO<sub>3</sub> (\* stands for the spinning bands).

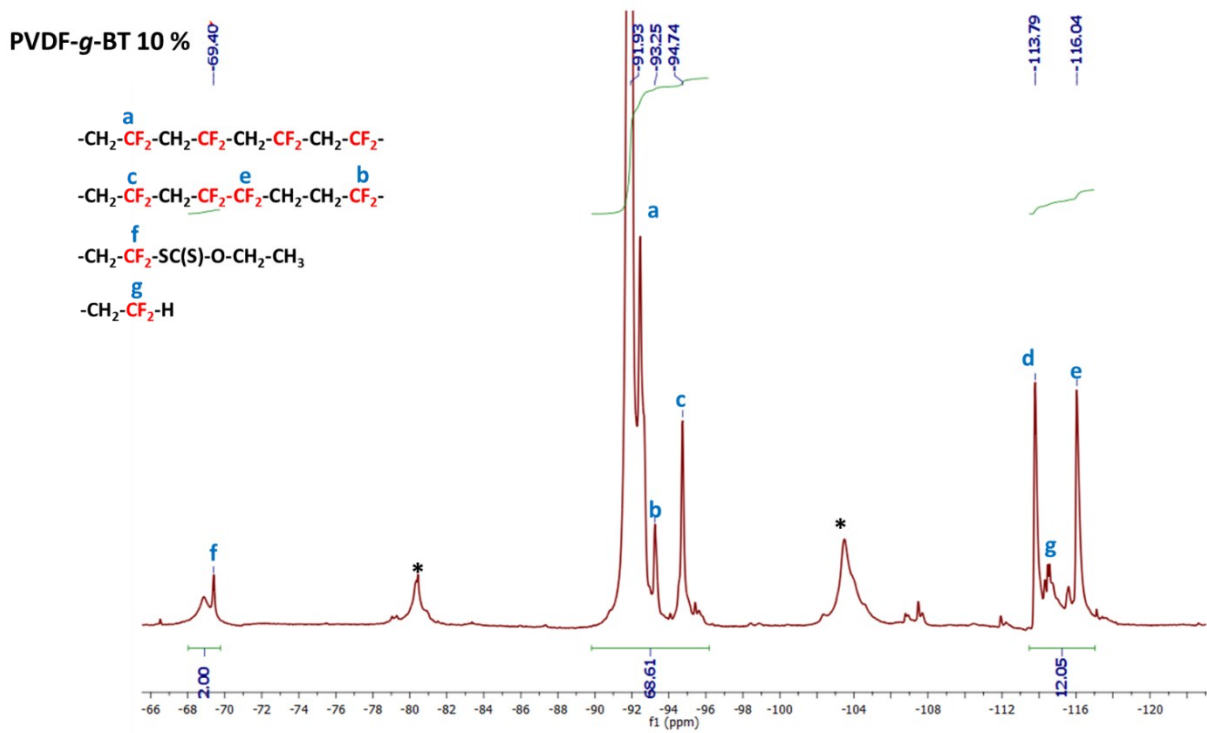

**Figure S3.** Expansion of the  $-64$  to  $-120$  ppm region of the  $^{19}F$  HRMAS spectrum recorded in  $d_6$ -DMSO of PVDF-g-BaTiO<sub>3</sub> nanocomposite filled with 10 wt % of BaTiO<sub>3</sub> (\* stands for the spinning bands).

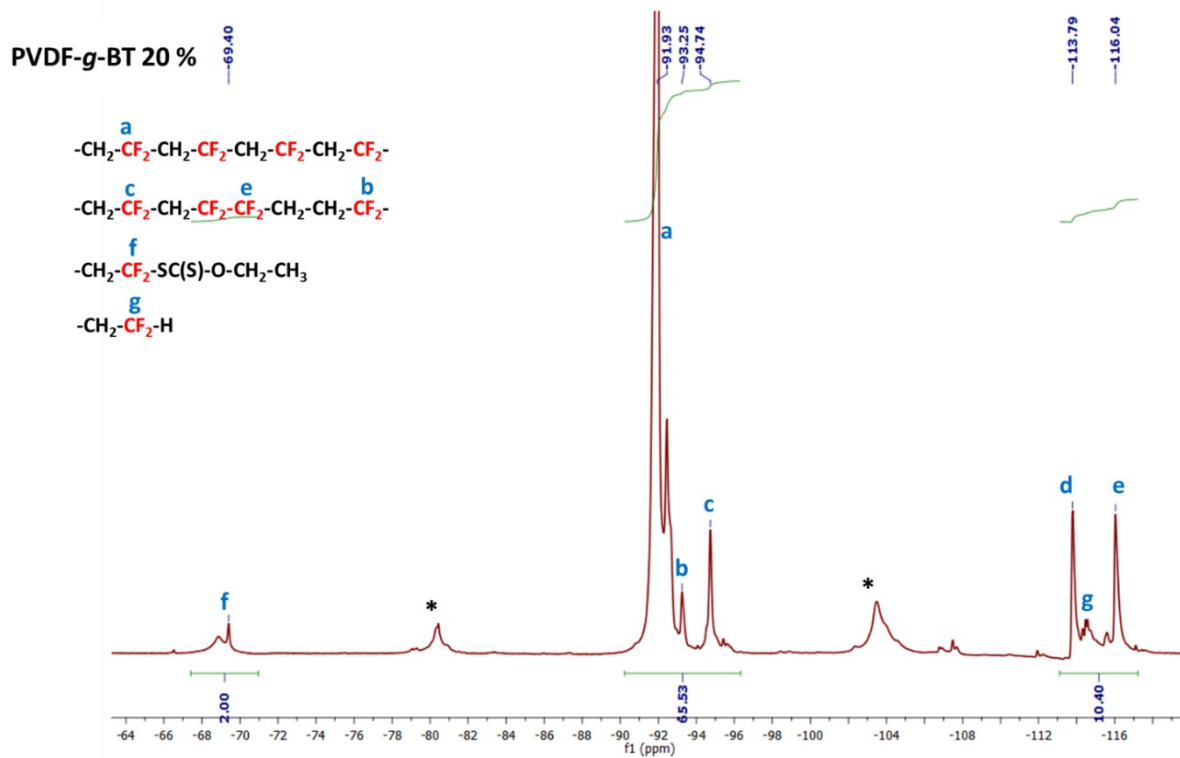

**Figure S4.** Expansion of the  $-64$  to  $-120$  ppm region of the  $^{19}\text{F}$  HRMAS spectrum recorded in  $d_6$ -DMSO of PVDF-g-BaTiO<sub>3</sub> nanocomposite filled with 20 wt % of BaTiO<sub>3</sub> (\* stands for the spinning bands).

### PVDF-g-BT 5 %

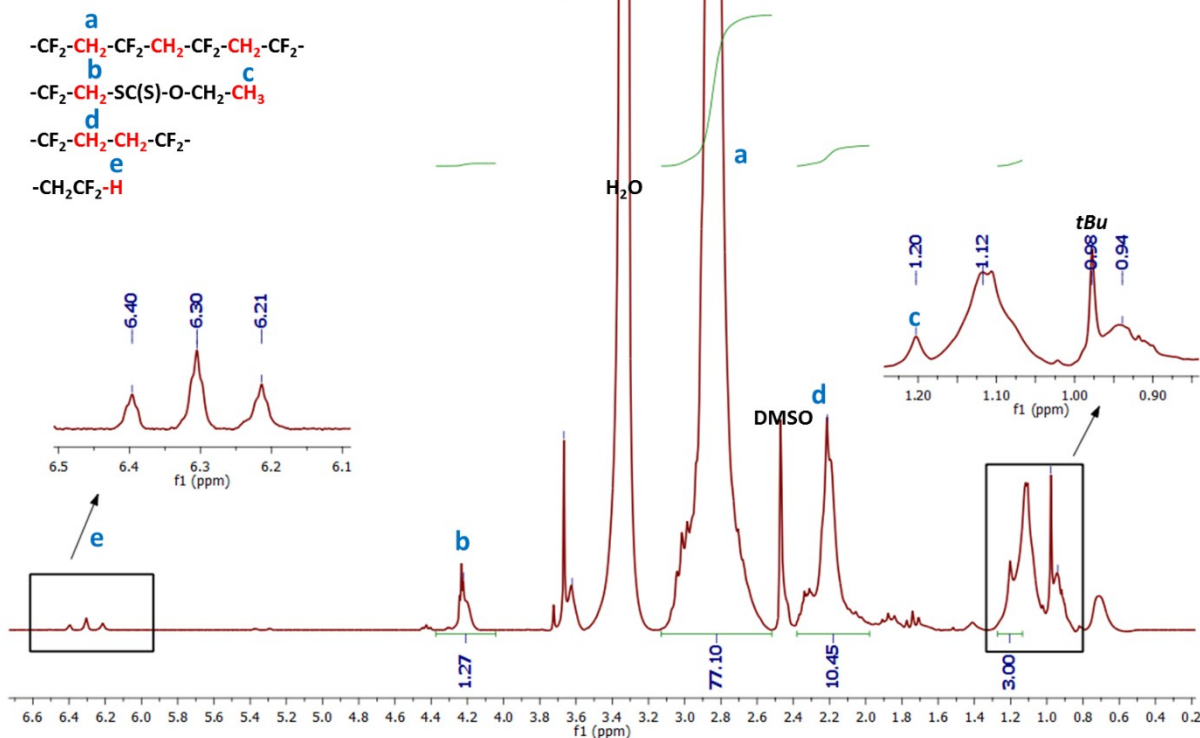

**Figure S5.** Expansion of the 0.2 to 6.4 ppm region of the <sup>1</sup>H HRMAS NMR spectrum in DMSO PVDF-g-BT nanocomposites filled with 5 wt % of BaTiO<sub>3</sub>

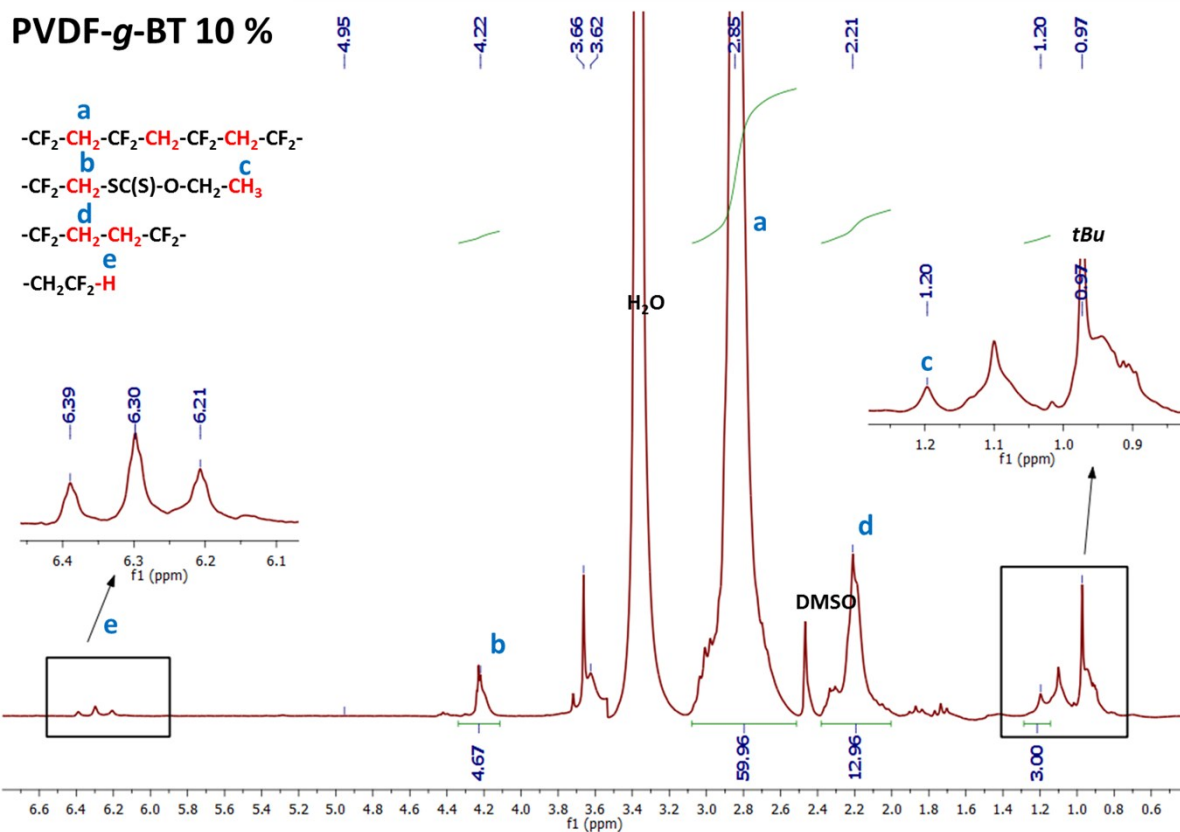

**Figure S6.** Expansion of the 0.2 to 6.4 ppm region of the <sup>1</sup>H HRMAS NMR spectrum in DMSO PVDF-g-BT nanocomposites filled with 10 wt % of BaTiO<sub>3</sub>

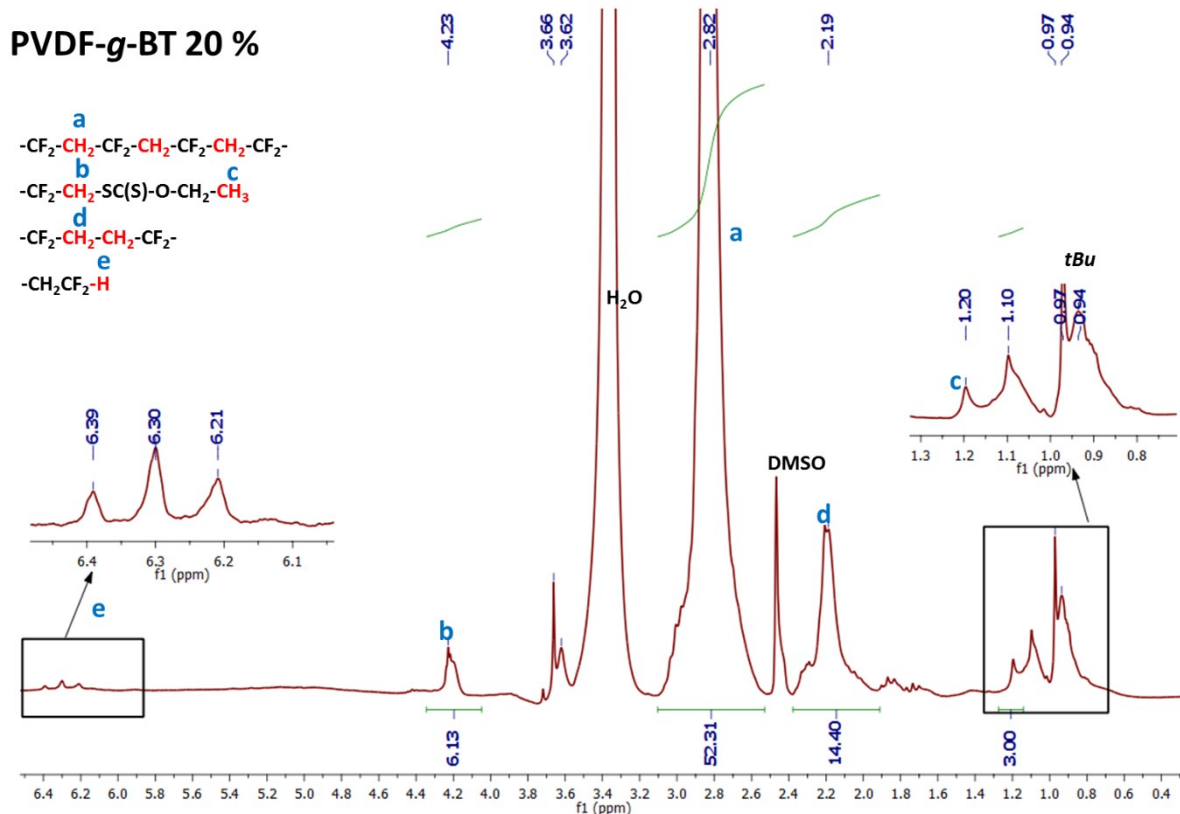

**Figure S7.** Expansion of the 0.2 to 6.4 ppm region of the  $^1\text{H}$  HRMAS NMR spectrum in DMSO PVDF-g-BT nanocomposites filled with 20 wt % of  $\text{BaTiO}_3$

### *Determination of Molar Mass of grafted PVDF*

To cleave the attached PVDF from the functionalized  $\text{BaTiO}_3$  nanoparticles, an amount of PVDF-g-BT was dispersed in a mixture of DMF or DMF/Aliquat according to procedures describe in literature.<sup>1,2</sup> Then Acid (HF or HCl) was added and the mixture was allowed to stir for a certain time and temperature. At the end of the reaction, the mixture was centrifuged and the supernatant was concentrated then precipitated over cold pentane or methanol.



**Table S1: Experiments conducted to enable the acidic cleavage of attached PVDF from functionalized nanoparticles.**

| Exp N° | wt PVDF- <i>g</i> -BT<br>(% of BT) (mg) | wt (Aliquot)<br>(mg) | V <sub>DMF</sub><br>(ml) | V <sub>acid</sub> (ml) | time (T, °C) |
|--------|-----------------------------------------|----------------------|--------------------------|------------------------|--------------|
| 1      | 50 (10%)                                | 5                    | 3                        | 0.5 (HF)               | 16 hr (25)   |
| 2      | 50 (10%)                                | 5                    | 3                        | 0.5 (HF)               | 3 days (25)  |
| 3      | 30 ( 5%)                                | 5                    | 3                        | 0.5 (HF)               | 5 days (25)  |
| 4      | 50 20%                                  | 0                    | 5                        | 0.5 (HCl)              | 16 hr (80)   |
| 5      | 40 ( 3%)                                | 0                    | 4                        | 0.4 (HCl)              | 16 hr (80)   |

In fact, the molar mass of grafted polymer can also be determined by NMR. According to previous works, the Mn obtained from SEC is almost equal to that obtained by NMR.<sup>3</sup> Since, whatever the experimental conditions reported above, the cleavage did not work, the Mn of the nanocomposites were determined using the <sup>1</sup>H and <sup>19</sup>F HRMAS NMR spectroscopies (Table 2) according to equation previously report by Guerre et al.<sup>4</sup>

$$M_{n,NMR} = M_{n,CTA} + DP(Z - CTA) \times M_{n,VDF}$$

where  $M_{n,CTA} = 472$  g/mol and  $M_{n,VDF} = 64$  g/mol

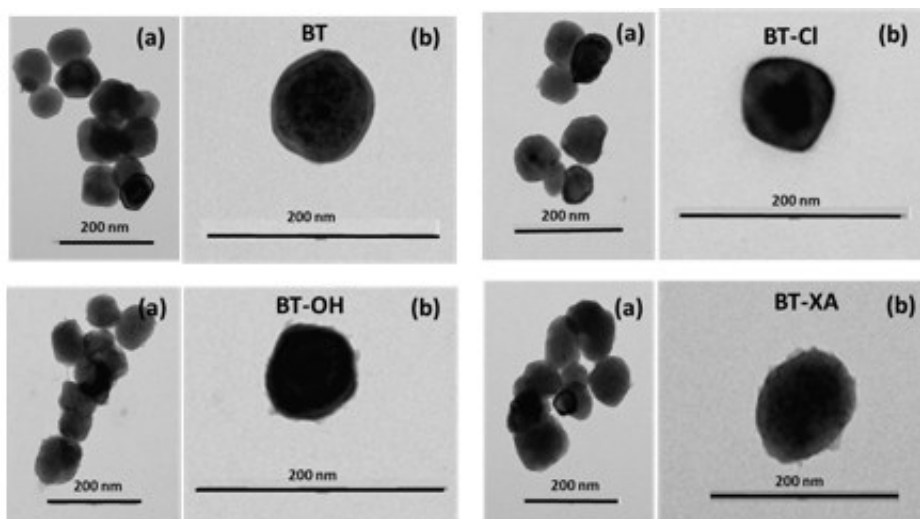

**Figure S8.** TEM images of the as received and functionalized BaTiO<sub>3</sub> particles with (a) (low magnification) and (b) (higher magnification)

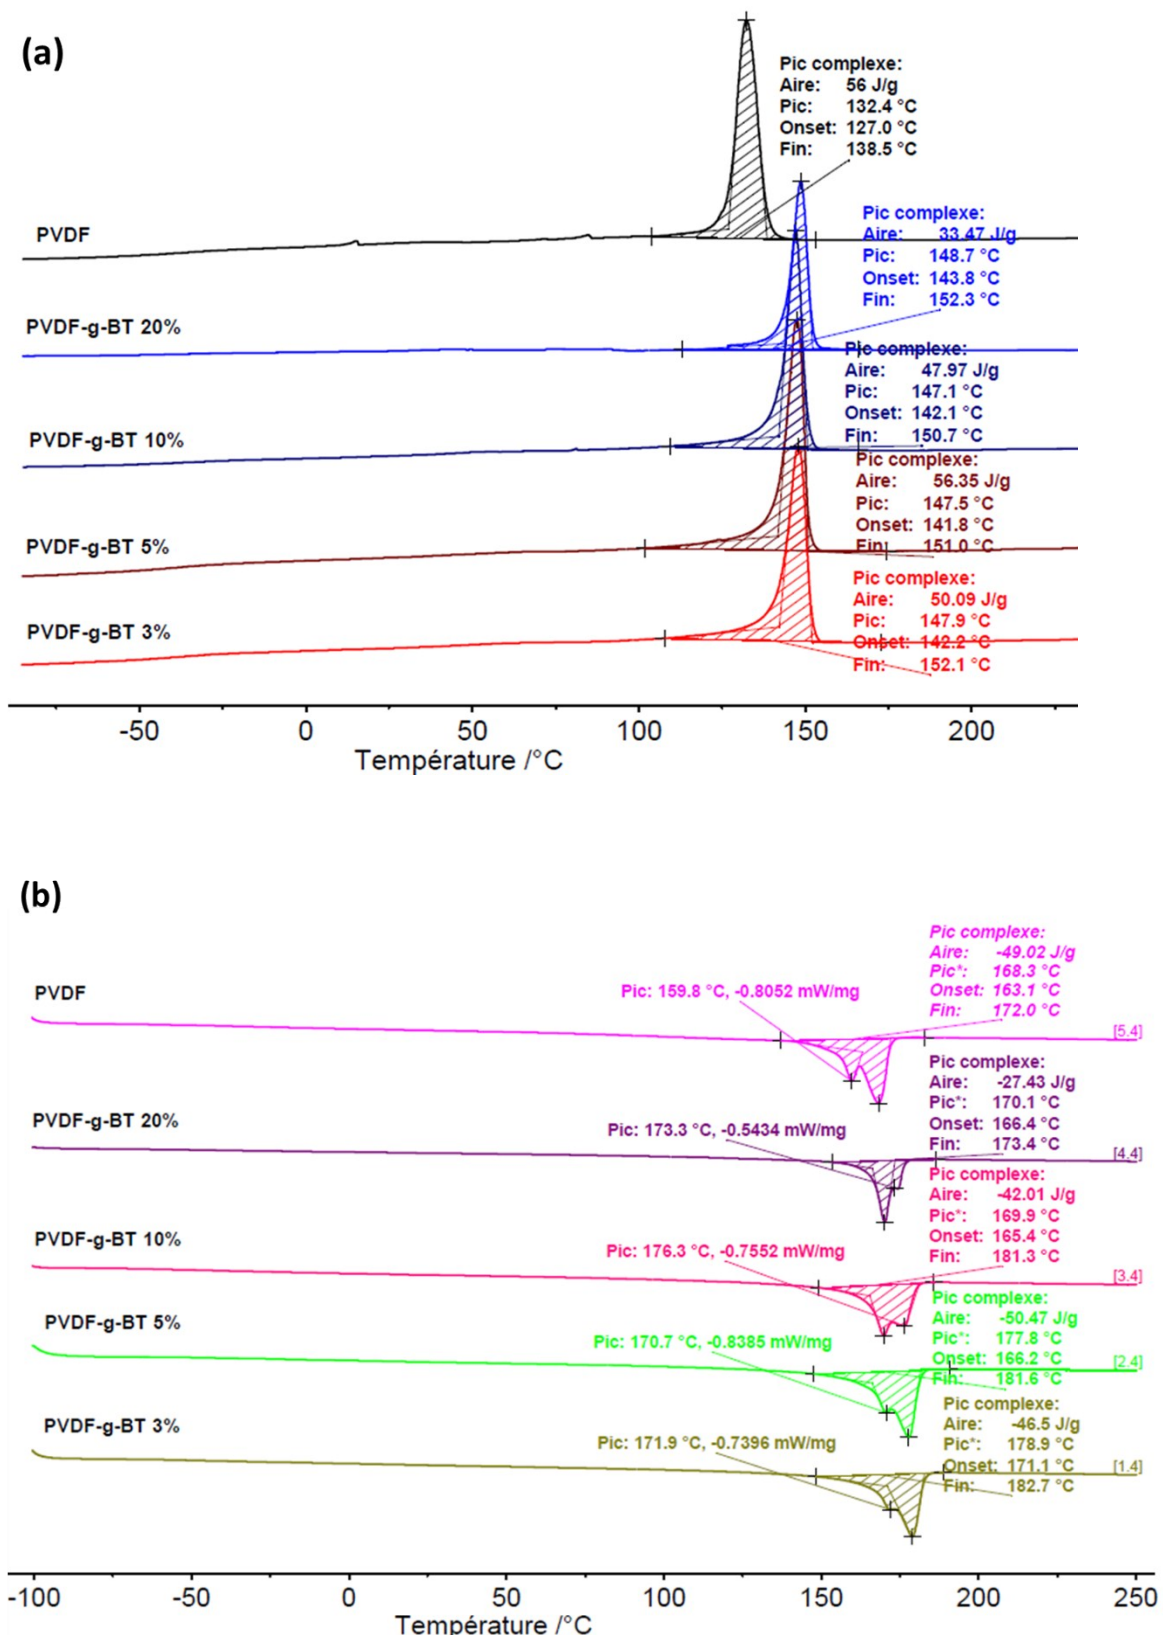

**Figure S9.** DSC thermograms (second heating and cooling) of PVDF from conventional radical polymerization of VDF initiated by TBPPi and PVDF-g-BaTiO<sub>3</sub> nanocomposites with different BT fractions: (a) heating process, (b) cooling process.

- 1 S. Jafarzadeh, V. Haddadi-Asl and H. Roghani-Mamaqani, *J. Polym. Res.*, 2015, **22**, 123.
- 2 L. Xiong, H. Liang, R. Wang and L. Chen, *J. Polym. Res.*, 2011, **18**, 1017–1021.
- 3 K. Yang, X. Huang, M. Zhu, L. Xie, T. Tanaka and P. Jiang, *ACS Appl. Mater. Interfaces*, 2014, **6**, 1812–1822.
- 4 M. Guerre, B. Campagne, O. Gimello, K. Parra, B. Ameduri and V. Ladmiral, *Macromolecules*, 2015, **48**, 7810–7822.
